# Supplementary material for: Utilizing thiol–ene coupling kinetics in the design of renewable thermoset resins based on d-limonene and polyfunctional thiols
Source: Royal Society of Chemistry journal article supplement (doi:10.1039/c3ra47922f), 2014-01-01
Supplement: c3ra47922f1.pdf [file c3ra47922f1.pdf]

## Supplementary Information

### Utilizing Thiol–Ene Coupling Kinetics in the Design of Renewable Thermoset Resins based on *D*-Limonene and Polyfunctional Thiols

Mauro Claudino<sup>1</sup>, Mats Jonsson<sup>2</sup>, Mats Johansson<sup>1,\*</sup>

<sup>1</sup> Department of Fibre and Polymer Technology, School of Chemical Science and Engineering,  
KTH Royal Institute of Technology, SE-100 44 Stockholm, Sweden.

<sup>2</sup> Department of Chemistry, School of Chemical Science and Engineering, KTH Royal Institute of  
Technology, SE-100 44 Stockholm, Sweden.

\* Corresponding author. Tel.: (+46) 8 790 92 87; Fax: (+46) 8 790 82 83.

E-mail addresses: [claudino@kth.se](mailto:claudino@kth.se) (M. Claudino), [matsj@kth.se](mailto:matsj@kth.se) (M. Jonsson), [matskg@kth.se](mailto:matskg@kth.se)  
(M. Johansson)

## Supporting experimental data:

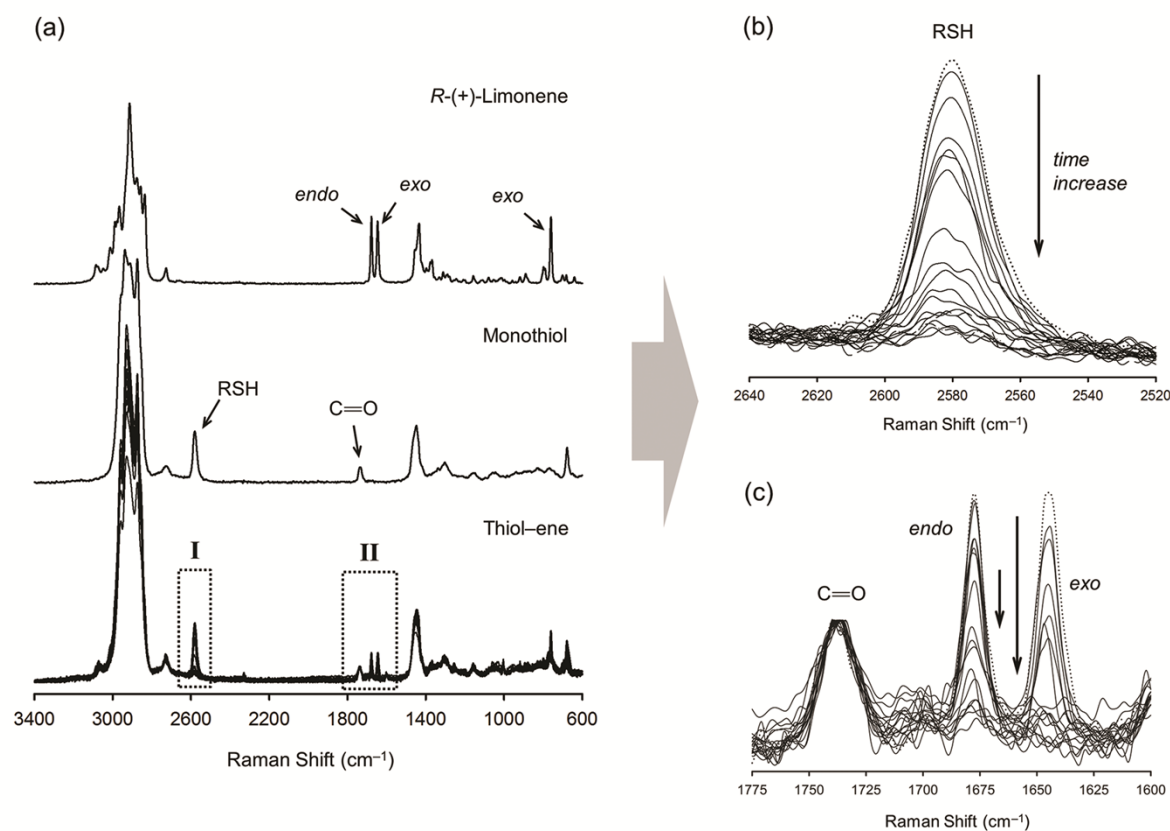

Figure S1. Normalized FT-Raman spectra of samples obtained from photoinduced thiol-ene reaction of monofunctional system mixed on a 1:1 thiol-ene functional group stoichiometry (2:1 thiol-ene molecular ratio). (a) overall kinetic spectra collection in comparison to pure thiol and ene reactants; (b) *zoom-in* of region I showing the time-consumption of thiol; and, (c) *zoom-in* of region II showing the time-disappearance of individual unsaturations. Dotted line refers to the initial mixture (STM). The carbonyl group ( $\text{C}=\text{O}$ ,  $1735 \text{ cm}^{-1}$ ) was used as internal reference band in the spectral normalization process. Long arrows denote fast consumption of functional groups whereas the small arrow indicates slow disappearance of endocyclic double-bonds.

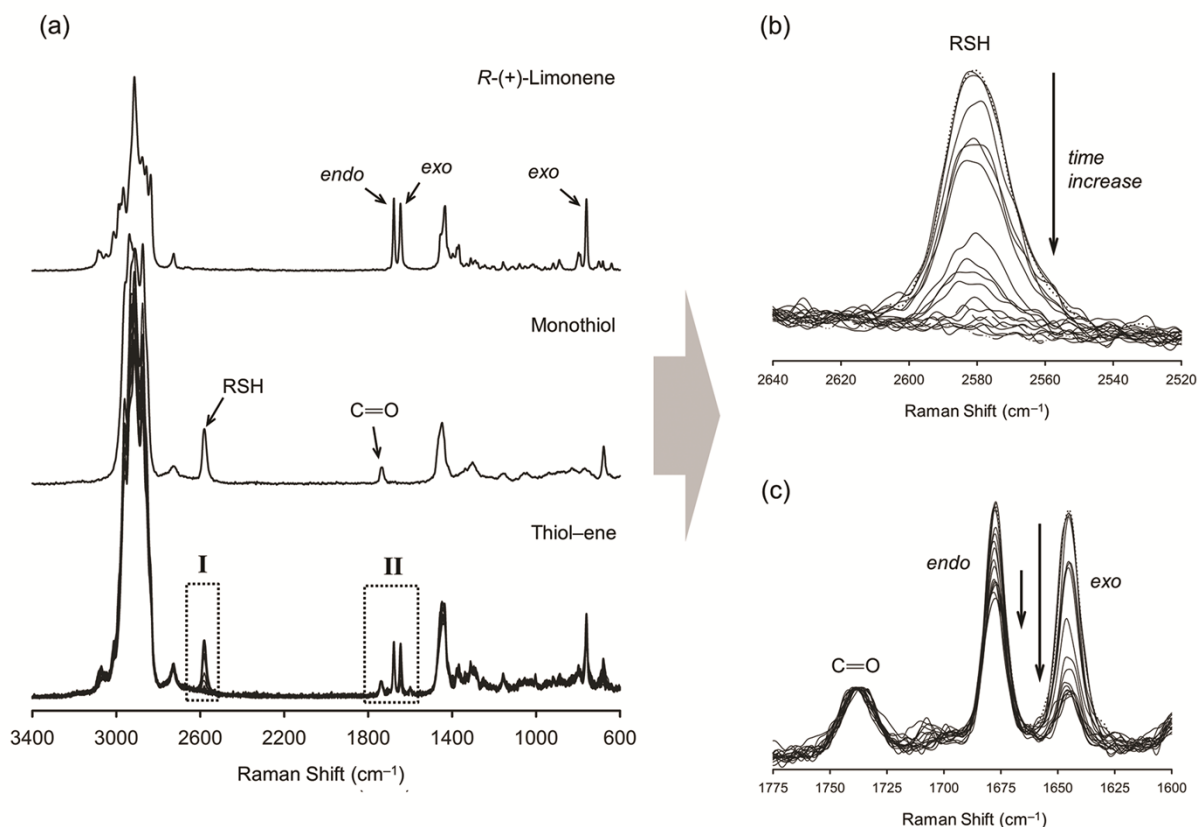

Figure S2. Normalized FT-Raman spectra of samples obtained from photoinduced thiol-ene reaction of monofunctional system mixed on a 1:0.5 thiol-ene functional group stoichiometry (1:1 thiol-ene molecular ratio). (a) overall kinetic spectra collection in comparison to pure thiol and ene reactants; (b) *zoom-in* of region I showing the time-consumption of thiol; and, (c) *zoom-in* of region II showing the time-disappearance of individual unsaturations. Dotted line refers to the initial mixture (STM). The carbonyl group ( $\text{C}=\text{O}$ ,  $1735\text{ cm}^{-1}$ ) was used as internal reference band in the spectral normalization process. Long arrows denote fast consumption of functional groups whereas the small arrow indicates slow disappearance of endocyclic double-bonds.
